# Supplementary material for: The association of adelmidrol with sodium hyaluronate displays beneficial properties against bladder changes following spinal cord injury in mice
Source: PubMed Central journal article supplement (PMC6336272; doi:10.1371/journal.pone.0208730), 2019-01-17
Supplement: pone.0208730.s001.pdf [file pone.0208730.s001.pdf]

The association of adelmidrol with sodium hyaluronate **displays beneficial properties** against bladder changes following spinal cord injury in mice.

**Short title:** Effect of adelmidrol and sodium hyaluronate on bladder after spinal cord injury

Michela Campolo<sup>a#</sup>, Rosalba Siracusa<sup>a #</sup>, Marika Cordaro<sup>a</sup>, Alessia Filippone<sup>a</sup>, Enrico Gugliandolo<sup>a</sup>, Alessio F. Peritore<sup>a</sup>, Daniela Impellizzeri<sup>a</sup>, Rosalia Crupi<sup>a</sup>, Irene Paterniti<sup>a</sup>, Salvatore Cuzzocrea<sup>a,b\*</sup>.

<sup>a</sup> University of Messina, Department of Chemical, Biological, Pharmaceutical and Environmental Sciences, Messina, Italy

<sup>b</sup> Saint Louis University School of Medicine, Department of Pharmacological and Physiological Science, Saint Louis, USA

<sup>#</sup>These authors contributed equally to this work

\*Corresponding Author: Prof. Salvatore Cuzzocrea, Department of Chemical, Biological, Pharmaceutical and Environmental Sciences, University of Messina, Viale Ferdinando Stagno D'Alcontres n°31 98166 Messina, Italy; Tel.: +39 090-6765208, email: salvator@unime.it

## Full images of Western bots for Figure 5

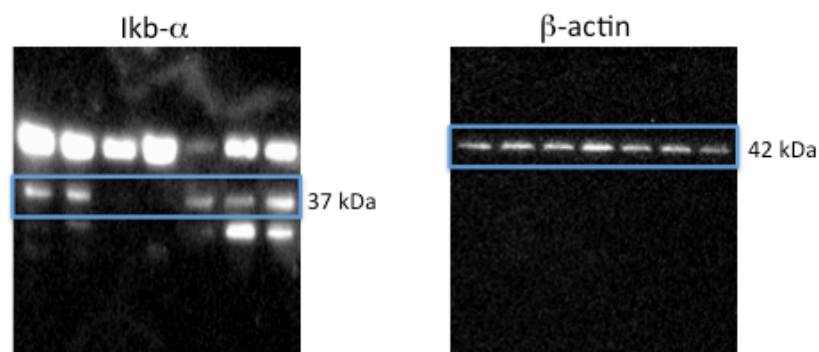

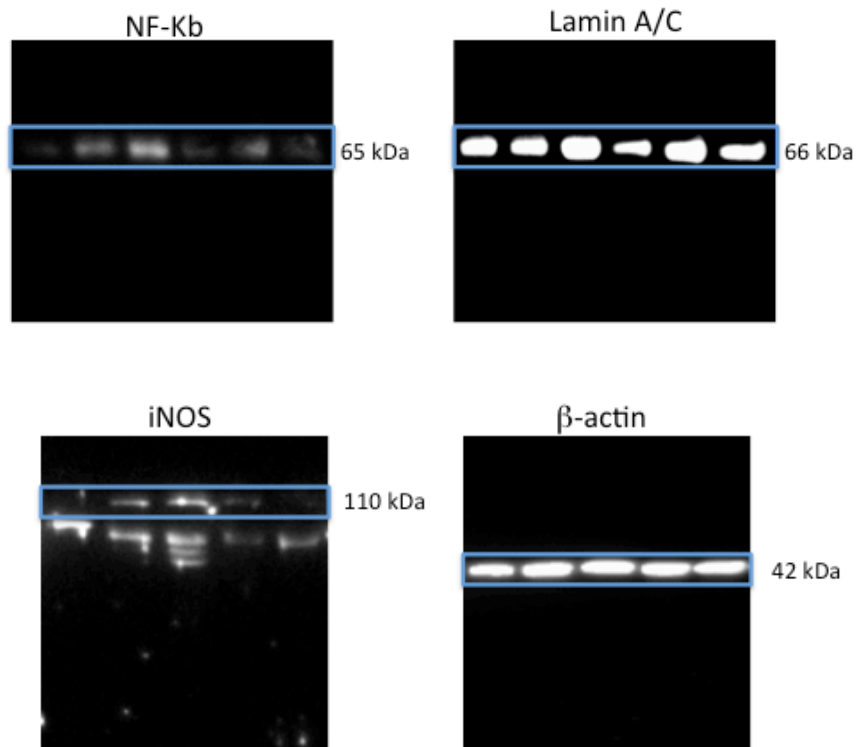

**Suppl.Fig 5.** original blot of Figure 5
